# Supplementary material for: Attenuated Risk Association of End-Stage Kidney Disease with Metformin in Type 2 Diabetes with eGFR Categories 1–4
Source: MDPI journal article supplement (doi:10.3390/ph15091140), 2022-09-13
Supplement: s1 [file s1]

## Supplemental Material

|                                                                                                                                                   |   |
|---------------------------------------------------------------------------------------------------------------------------------------------------|---|
| Figure S1. Time frame definitions in the population-based cohort .....                                                                            | 2 |
| Figure S2. Study design and patient selection in the register-based cohort.....                                                                   | 3 |
| Table S1. Definitions of outcomes and covariates .....                                                                                            | 4 |
| Table S2. Characteristics of metformin and non-metformin users during the observational period in the register-based cohort .....                 | 5 |
| Table S3. Characteristics of 100,810 patients in the population-based cohort with propensity-score overlap-weighting (PS-OW) .....                | 6 |
| Figure S3. Associations of daily mean dose of metformin with all-cause mortality and MACE by eGFR categories in the population-based cohort ..... | 7 |

## A The new-metformin versus other-OGLDs design

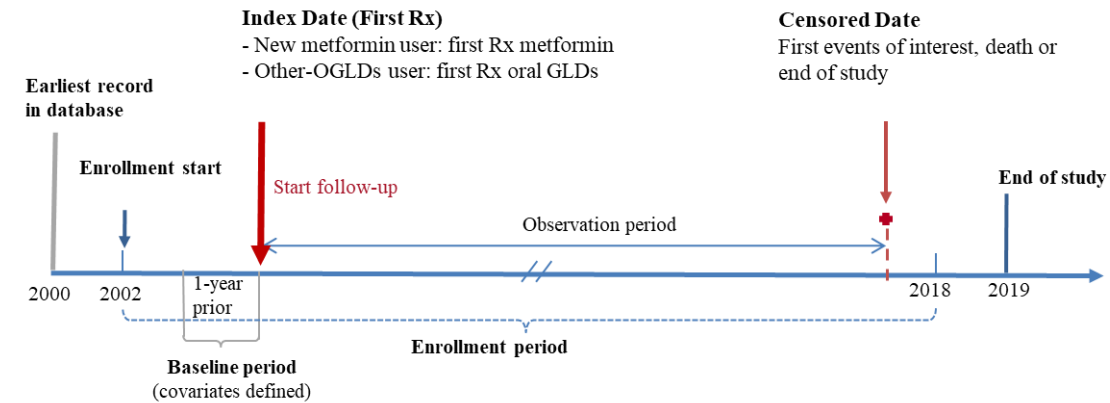

### Covariates measured at enrolment

- Sex, age, year of diagnosis, cancer history
- Non-laboratory-based risk factors: Family history, smoking, body mass index, systolic and diastolic blood pressure, and waist circumference

### Baseline covariates 1 year prior to index year of start of prescription

- Laboratory-based tests: HbA1c, lipids (triglyceride, total cholesterol, HDL-C and LDL-C), urinary ACR, blood haemoglobin and eGFR
- Comorbidities (CVD and cancer), medications (glucose lowering drugs, RAS inhibitors and statins)

### Covariates available at observation period

## B The new-metformin versus non-GLDs design

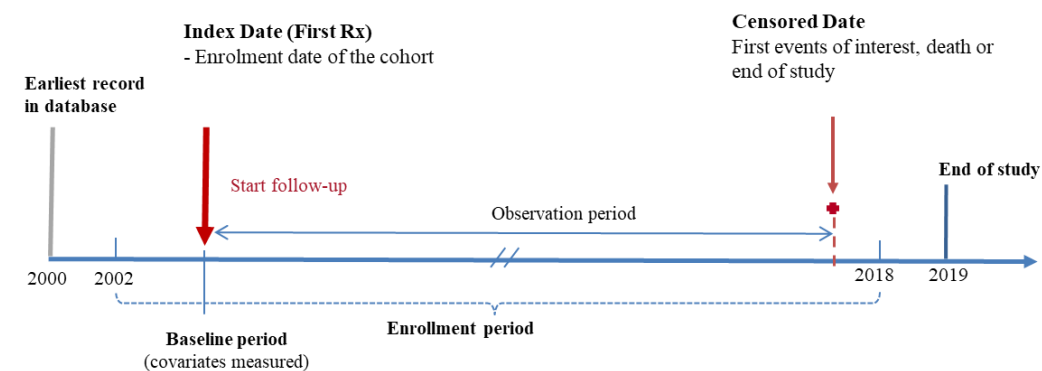

### Covariates measured at enrolment

- Age, sex, disease duration, cancer history
- Non-laboratory-based risk factors: family history, smoking, body mass index, systolic and diastolic blood pressure, and waist circumference
- Laboratory-based risk factors: HbA1c, lipids (triglyceride, total cholesterol, HDL-C and LDL-C), urinary albumin-to-creatinine ratio (ACR), blood haemoglobin, estimated glomerular filtration rate (eGFR)
- prevalent use of medications (glucose lowering drugs, RAS inhibitors and statins)

### Covariates available during observation period

- Laboratory tests, comorbidities (CVD and cancer), medications

**Figure S1. Time frame definitions in the population-based cohort**

In the new-metformin versus other-OGLDs design (A), the index date was defined as the earliest date of dispensing of metformin or other oral glucose-lowering drugs (OGLDs) after enrolment to the cohort. The follow-up ended at the earliest date of first event of MACE or ESKD or all-cause mortality or censor date (December 31, 2019). In the new-metformin versus non-GLDs design (B), the index date was defined as the date of enrolment to the cohort.

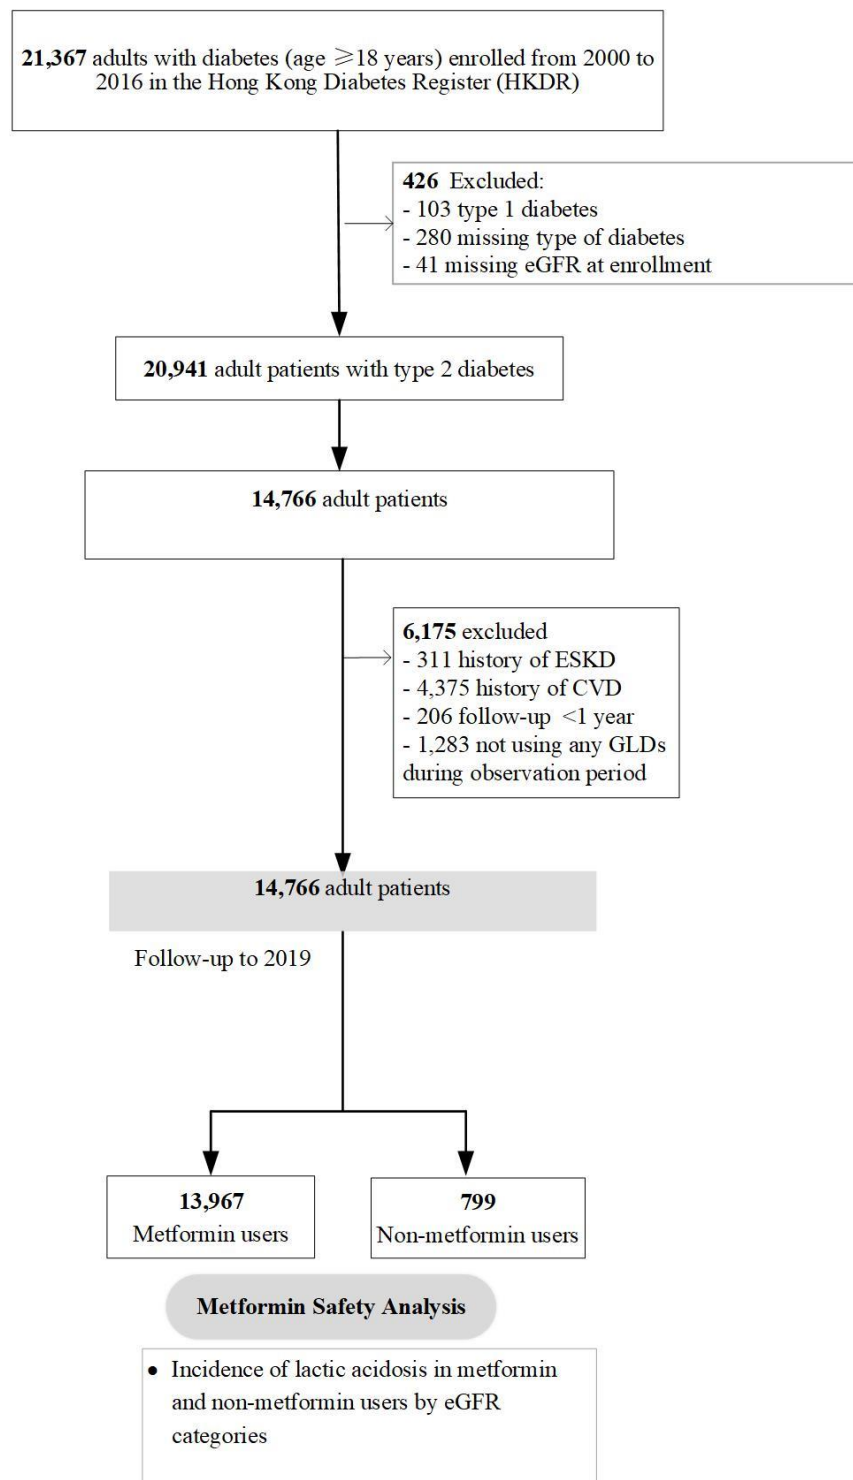

**Figure S2. Study design and patient selection in the register-based cohort**

**Table S1. Definitions of outcomes and covariates**

| <b>Variables</b>                            | <b>Definition</b>                                                                                                                                                                                                                                                                                                                                                                                                                                                                                                                                                                                                                   |
|---------------------------------------------|-------------------------------------------------------------------------------------------------------------------------------------------------------------------------------------------------------------------------------------------------------------------------------------------------------------------------------------------------------------------------------------------------------------------------------------------------------------------------------------------------------------------------------------------------------------------------------------------------------------------------------------|
| All-cause mortality                         | ICD-10 cause of death from Hong Kong Death Register<br>Cause of death: cardiovascular (CV) death (I00-I99, F01, G45), cancer (C00-C97), kidney disease (N17-N19), pneumonia (J12-J18), others (all other codes)                                                                                                                                                                                                                                                                                                                                                                                                                     |
| Major adverse cardiovascular events (MACE)  | Nonfatal myocardial infarction (ICD-9 code: 410), non-fatal stroke (ICD-9 code: 430, 431, 434 and 436), and CV-death.                                                                                                                                                                                                                                                                                                                                                                                                                                                                                                               |
| End-stage kidney disease (ESKD)             | eGFR < 15 mL/min/1.73 m <sup>2</sup> on at least two occasions at least 90 days apart and that is not associated with acute kidney injury (AKI). eGFR values contained within AKI episodes were first removed (top 15 ICD-9 code 584).<br>Peritoneal dialysis (procedure code: 54.98)<br>Transplant of kidney (procedure code: 55.6)<br>Complications of transplanted kidney (996.81)<br>Persons with a condition influencing their health status; organ or tissue replaced by transplant; kidney (V42.0)                                                                                                                           |
| Acute myocardial infarction (AMI)           | ICD-9 code: 410                                                                                                                                                                                                                                                                                                                                                                                                                                                                                                                                                                                                                     |
| Ischemic heart disease (IHD)                | ICD-9 code: 410-414                                                                                                                                                                                                                                                                                                                                                                                                                                                                                                                                                                                                                 |
| Heart failure                               | ICD-9 code: 428                                                                                                                                                                                                                                                                                                                                                                                                                                                                                                                                                                                                                     |
| Stroke                                      | ICD-9 code: 430-434, 436                                                                                                                                                                                                                                                                                                                                                                                                                                                                                                                                                                                                            |
| Cardiovascular diseases (CVD)               | IHD; stroke; diabetes with peripheral circulatory disorders (250.7); gangrene (785.4); peripheral angiopathy in diseases classified elsewhere (443.81); peripheral vascular disease, unspecified (443.9); 2); other (peripheral) vascular shunt or bypass (procedure code: 39.29); insertion of non-drug-eluting peripheral vessel stent(s) (procedure code: 39.90); amputation of lower limb (procedure code of 84.1) ); other procedure codes (surgical revascularization: 38.08, 38.18, 38.38, 38.48, 38.68, 38.88, 39.25, 39.49, 39.56, 39.57, 39.58, 39.59, 39.99; endovascular revascularization: 00.55, 17.56, 39.50, 39.79) |
| Cancer                                      | ICD-9 code: 140-208                                                                                                                                                                                                                                                                                                                                                                                                                                                                                                                                                                                                                 |
| Estimated glomerular filtration rate (eGFR) | The serum creatinine-based CKD-Epidemiological Collaboration (CKD-EPI) Equation                                                                                                                                                                                                                                                                                                                                                                                                                                                                                                                                                     |
| eGFR categories                             | G1: eGFR >90 mL/min/1.73 m <sup>2</sup> ; G2: eGFR 60-90 mL/min/1.73 m <sup>2</sup> ; G3: eGFR 30-59 mL/min/1.73 m <sup>2</sup> ; G3a: eGFR 45-59 mL/min/1.73 m <sup>2</sup> ; G3b: eGFR 30-44 mL/min/1.73 m <sup>2</sup> ; G4: eGFR 15-29 mL/min/1.73 m <sup>2</sup>                                                                                                                                                                                                                                                                                                                                                               |
| <b>Medications</b>                          | Based on the Anatomical Therapeutic Chemical (ATC) code                                                                                                                                                                                                                                                                                                                                                                                                                                                                                                                                                                             |
| Glucose lowering drugs (GLDs)               |                                                                                                                                                                                                                                                                                                                                                                                                                                                                                                                                                                                                                                     |
| Metformin                                   | ATC: A10BA                                                                                                                                                                                                                                                                                                                                                                                                                                                                                                                                                                                                                          |
| <b>Other-GLDs</b>                           |                                                                                                                                                                                                                                                                                                                                                                                                                                                                                                                                                                                                                                     |
| Insulin                                     | ATC: A10A                                                                                                                                                                                                                                                                                                                                                                                                                                                                                                                                                                                                                           |
| Sulfonylureas                               | ATC:A10BB                                                                                                                                                                                                                                                                                                                                                                                                                                                                                                                                                                                                                           |
| Thiazolidinediones                          | ATC: A10BG                                                                                                                                                                                                                                                                                                                                                                                                                                                                                                                                                                                                                          |
| DPP-4is                                     | dipeptidyl peptidase 4 inhibitors, ATC: A10BH                                                                                                                                                                                                                                                                                                                                                                                                                                                                                                                                                                                       |
| AGIs                                        | alpha-glucosidase inhibitors, ATC: A10BF                                                                                                                                                                                                                                                                                                                                                                                                                                                                                                                                                                                            |
| GLP-1RAs                                    | glucagon-like peptide-1 (GLP-1) receptor analogues, ATC: A10BJ                                                                                                                                                                                                                                                                                                                                                                                                                                                                                                                                                                      |
| SGLT2is                                     | sodium-glucose co-transporter 2 (SGLT2) inhibitors, ATC: A10BK                                                                                                                                                                                                                                                                                                                                                                                                                                                                                                                                                                      |
| Other medications                           |                                                                                                                                                                                                                                                                                                                                                                                                                                                                                                                                                                                                                                     |
| Statin                                      | HMG CoA reductase inhibitors (ATC: C10AA), simvastatin (ATC: C10AA01), atorvastatin (ATC: C10AA05), rosuvastatin (ATC: C10AA07), fluvastatin (ATC: C10AA04), pravastatin (ATC: C10AA03), lovastatin (ATC: C10AA02)                                                                                                                                                                                                                                                                                                                                                                                                                  |
| Renin-angiotensin system inhibitors (RASi)  | ACE inhibitors, plain (ATC: C09AA), ACE inhibitors and diuretics (ATC: C09BA), Angiotensin II receptor blockers (ARBs), plain (ATC: C09CA), Angiotensin II receptor blockers (ARBs) and diuretics (ATC: C09DA), Angiotensin II receptor blockers (ARBs) and calcium channel blockers (ATC: C09DB)                                                                                                                                                                                                                                                                                                                                   |

ICD, the International Classification of Diseases

**Table S2. Characteristics of metformin and non-metformin users during the observational period in the register-based cohort**

| Characteristics                    | Metformin users | Non-metformin users |
|------------------------------------|-----------------|---------------------|
| N (%)                              | 13967 (94.6)    | 799 (5.4)           |
| Men, %                             | 7181 (51.4)     | 476 (59.6)          |
| Age, years                         | 58.3 (10.7)     | 64.8 (11.7)         |
| Duration of diabetes, years        | 6.6 (6.8)       | 8.1 (7.6)           |
| Family history of diabetes         | 7705 (55.2)     | 305 (38.2)          |
| Smoking status                     |                 |                     |
| Non-smoker                         | 9831 (70.4)     | 505 (63.2)          |
| Ever-smoker                        | 2386 (17.1)     | 202 (25.3)          |
| Current-smoker                     | 1750 (12.5)     | 92 (11.5)           |
| Body Mass Index, kg/m <sup>2</sup> | 25.8 (4.2)      | 25.1 (4.2)          |
| SBP, mmHg                          | 133.2 (18.1)    | 139.2 (21.1)        |
| DBP, mmHg                          | 76.7 (10.6)     | 75.2 (11.6)         |
| Waist, cm                          | 88.3 (10.8)     | 87.2 (11.2)         |
| Triglyceride, mmol/L               | 1.7 (1.4)       | 1.8 (1.8)           |
| Total Cholesterol, mmol/L          | 4.8 (0.9)       | 4.9 (1.1)           |
| HDL-C, mmol/L                      | 1.3 (0.4)       | 1.4 (0.4)           |
| LDL-C, mmol/L                      | 2.7 (0.9)       | 2.8 (1.0)           |
| Urinary ACR, mg/mmol               |                 |                     |
| <3                                 | 9082 (65.0)     | 305 (38.2)          |
| 3-30                               | 3714 (26.6)     | 211 (26.4)          |
| >30                                | 1171 (8.4)      | 283 (35.4)          |
| HbA1c, %                           | 7.5 (1.6)       | 7.4 (1.8)           |
| eGFR, mL/min/1.73m <sup>2</sup>    | 84.9 (18.7)     | 56.2 (27.0)         |
| Haemoglobin, gm/dL                 | 13.7 (1.5)      | 13.0 (1.8)          |
| History of cancer, %               | 696 (5.0)       | 75 (9.4)            |
| History of medications, %          |                 |                     |
| Insulin                            | 2272 (16.3)     | 219 (27.4)          |
| Sulfonylurea                       | 8120 (58.1)     | 557 (69.7)          |
| DPP-4is                            | 665 (4.8)       | 52 (6.5)            |
| TZDs                               | 534 (3.8)       | 30 (3.8)            |
| AGIs                               | 387 (2.8)       | 33 (4.1)            |
| Not on any GLDs                    | 2491 (17.8)     | 181 (22.7)          |
| Statin                             | 4082 (29.2)     | 245 (30.7)          |
| RASi                               | 5465 (39.1)     | 393 (49.2)          |
| Period of index year, %            |                 |                     |
| <2003                              | 1913 (13.7)     | 179 (22.4)          |
| 2004-2007                          | 1993 (14.3)     | 123 (15.4)          |
| 2008-2011                          | 5848 (41.9)     | 287 (35.9)          |
| 2012-2016                          | 4213 (30.2)     | 210 (26.3)          |

SBP, systolic blood pressure; DBP, diastolic blood pressure; HDL-C, high-density lipoprotein cholesterol; LDL-C: low-density lipoprotein cholesterol; ACR, albumin to creatinine ratio; eGFR, estimated glomerular filtration rate; DPP-4is: dipeptidyl-peptidase 4 inhibitors; TZDs: thiazolidinediones; AGIs: alpha-glucosidase inhibitors; RASi: renin angiotensin system inhibitors.

**Table S3. Characteristics of 100,810 patients in the population-based cohort with propensity-score overlap-weighting (PS-OW)**

| Characteristics                    | New-metformin versus non-GLDs users |              |       |               |              |        |
|------------------------------------|-------------------------------------|--------------|-------|---------------|--------------|--------|
|                                    | Before PS-OW                        |              |       | After PS-OW   |              |        |
|                                    | New-metformin                       | Non-GLDs     | SMD   | New-metformin | Non-GLDs     | SMD    |
| n (%)                              | 70539                               | 30271        |       | 70539         | 30271        |        |
| Men, %                             | 31757 (45.0)                        | 12976 (42.9) | 0.043 | 42.7          | 42.7         | <0.001 |
| Age, years                         | 59.8 (10.9)                         | 64.9 (11.4)  | 0.455 | 63.0 (11.5)   | 63.0 (10.3)  | <0.001 |
| Duration of diabetes, years        | 1.9 (4.1)                           | 1.3 (3.1)    | 0.177 | 1.4 (3.5)     | 1.4 (3.1)    | <0.001 |
| Family history of diabetes         | 26348 (37.4)                        | 9453 (31.2)  | 0.129 | 33.4          | 33.4         | <0.001 |
| Smoking status                     |                                     |              | 0.113 |               |              | <0.001 |
| Non-smoker                         | 55736 (79.0)                        | 24142 (79.8) |       | 80.2          | 80.2         |        |
| Ever-smoker                        | 7931 (11.2)                         | 4022 (13.3)  |       | 12.3          | 12.3         |        |
| Current-smoker                     | 6872 ( 9.7)                         | 2107 ( 7.0)  |       | 7.5           | 7.5          |        |
| Body Mass Index, kg/m <sup>2</sup> | 26.5 (4.2)                          | 25.9 (4.1)   | 0.130 | 26.2 (4.2)    | 26.2 (4.0)   | <0.001 |
| SBP, mmHg                          | 133.2 (13.1)                        | 133.6 (14.2) | 0.034 | 133.3 (14.1)  | 133.3 (13.1) | <0.001 |
| DBP, mmHg                          | 75.3 (8.5)                          | 74.2 (9.4)   | 0.117 | 74.7 (9.3)    | 74.7 (8.7)   | <0.001 |
| Waist, cm                          | 90.4 (10.2)                         | 89.5 (10.1)  | 0.098 | 90.0 (10.2)   | 90.0 (9.9)   | <0.001 |
| Triglyceride, mmol/L               | 1.8 (1.5)                           | 1.6 (1.0)    | 0.186 | 1.6 (1.2)     | 1.6 (1.1)    | <0.001 |
| Total Cholesterol, mmol/L          | 5.2 (1.0)                           | 5.0 (1.0)    | 0.202 | 5.0 (1.0)     | 5.0 (1.0)    | <0.001 |
| HDL-C, mmol/L                      | 1.3 (0.3)                           | 1.3 (0.4)    | 0.176 | 1.3 (0.4)     | 1.3 (0.4)    | <0.001 |
| LDL-C, mmol/L                      | 3.1 (0.9)                           | 2.9 (0.8)    | 0.197 | 3.0 (0.9)     | 3.0 (0.9)    | <0.001 |
| Urinary ACR, mg/mmol               |                                     |              | 0.044 |               |              | <0.001 |
| <3                                 | 52049 (73.8)                        | 22918 (75.7) |       | 75.9          | 75.9         |        |
| 3-30                               | 15936 (22.6)                        | 6340 (20.9)  |       | 20.9          | 20.9         |        |
| >30                                | 2554 ( 3.6)                         | 1013 ( 3.3)  |       | 3.1           | 3.1          |        |
| HbA1c, %                           | 7.4 (1.7)                           | 6.4 (0.7)    | 0.834 | 6.5 (0.8)     | 6.5 (0.6)    | <0.001 |
| eGFR, mL/min/1.73m <sup>2</sup>    | 86.2 (16.8)                         | 81.4 (17.8)  | 0.280 | 83.3 (17.7)   | 83.3 (16.1)  | <0.001 |
| Haemoglobin, gm/dL                 | 13.9 (1.5)                          | 13.7 (1.5)   | 0.136 | 13.8 (1.5)    | 13.8 (1.5)   | <0.001 |
| History of cancer, %               | 2312 ( 3.3)                         | 1637 ( 5.4)  | 0.105 | 4.7           | 4.7          | <0.001 |
| History of medications, %          |                                     |              |       |               |              |        |
| Statin                             | 12143 (17.2)                        | 9837 (32.5)  | 0.359 | 27.9          | 27.9         | <0.001 |
| RASi                               | 12905 (18.3)                        | 7987 (26.4)  | 0.195 | 24.3          | 24.3         | <0.001 |
| Period of index year, %            |                                     |              | 0.625 |               |              | <0.001 |
| <2003                              | 5123 ( 7.3)                         | 291 ( 1.0)   |       | 1.6           | 1.6          |        |
| 2004-2007                          | 7949 (11.3)                         | 1151 ( 3.8)  |       | 5.7           | 5.7          |        |
| 2008-2011                          | 20479 (29.0)                        | 5831 (19.3)  |       | 23.8          | 23.8         |        |
| 2012-2016                          | 27254 (38.6)                        | 13480 (44.5) |       | 45.7          | 45.7         |        |
| 2017-2018                          | 9734 (13.8)                         | 9518 (31.4)  |       | 23.2          | 23.2         |        |

SMD, standardized mean difference; NA, not applicable; GLDs: glucose-lowering drugs; SBP, systolic blood pressure; DBP, diastolic blood pressure; HDL-C, high-density lipoprotein cholesterol; LDL-C: low-density lipoprotein cholesterol; ACR, albumin to creatinine ratio; eGFR, estimated glomerular filtration rate; RASi: renin angiotensin system inhibitors.

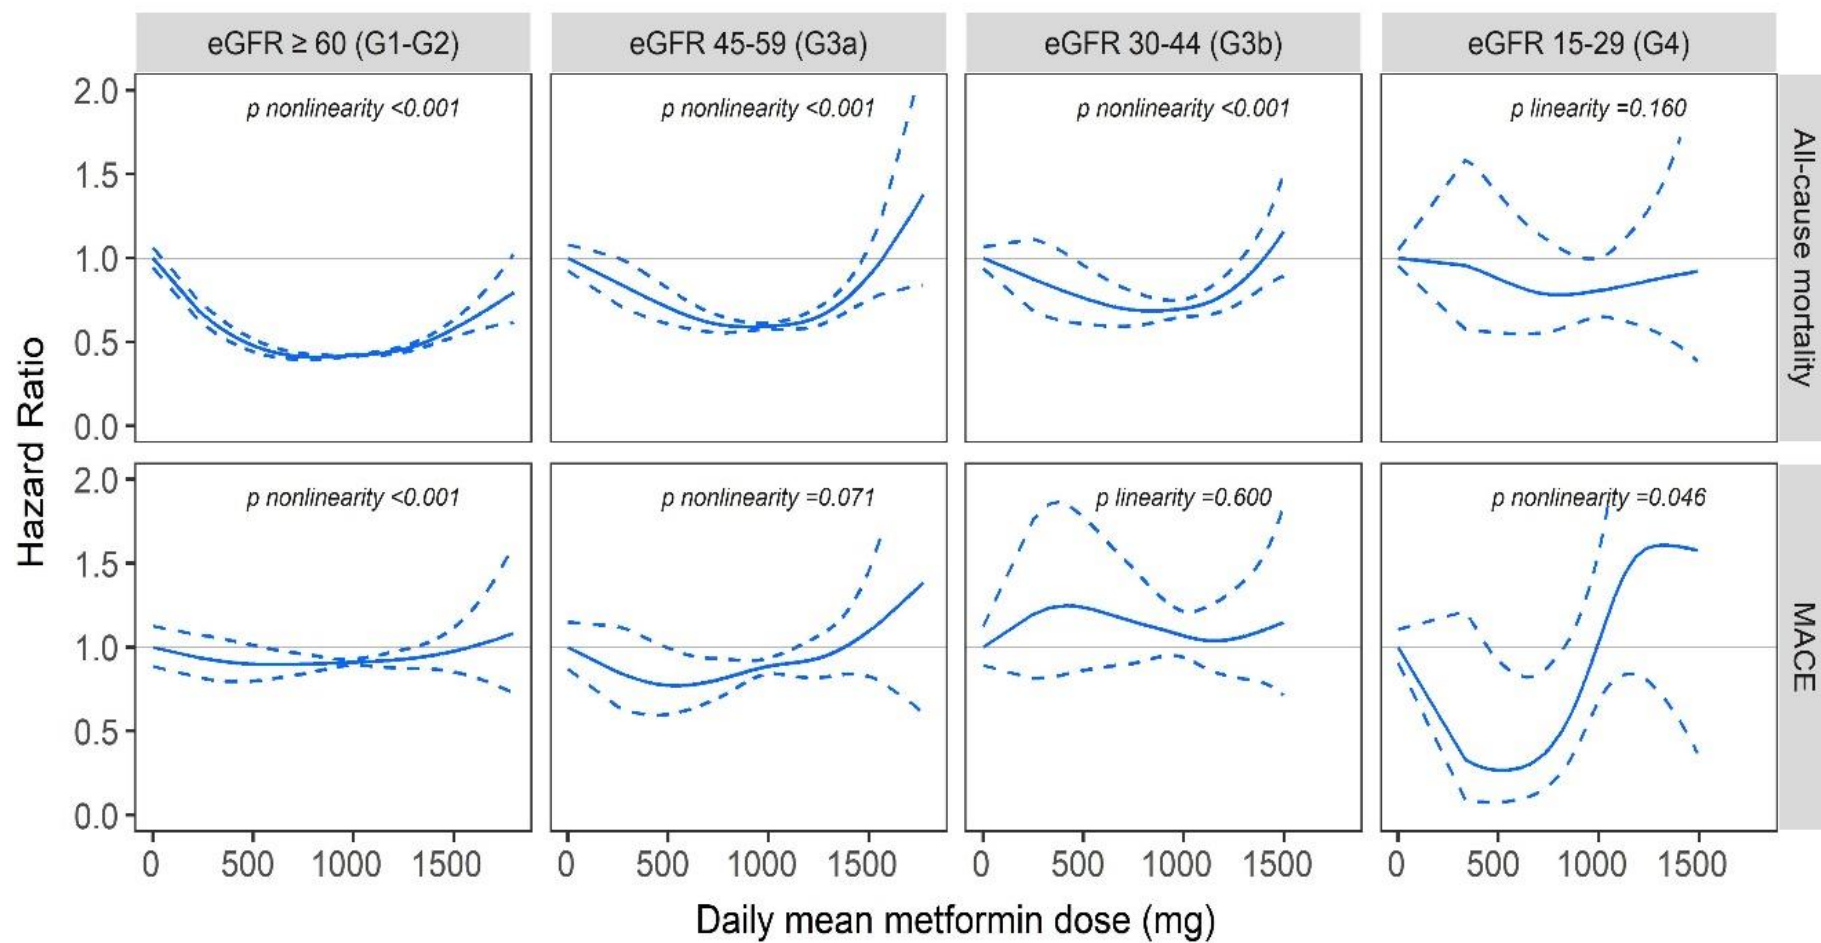

**Figure S3. Associations of daily mean dose of metformin with all-cause mortality and MACE by eGFR categories in the population-based cohort**

Penalized spline curve analyses with 3-knots were performed ( $n=96,643$ ) using Cox-model with time-varying mean daily dose of metformin exposure, adjusted for confounding effects due to age, sex, disease duration, cardiometabolic risk factors and cancer history at enrolment as well as time-varying covariates including HbA1c, lipids, comorbidities (CVD and cancer), and use of diabetes-related medications (insulin, oral glucose-lowering drugs, RAS inhibitors and statins) during observation.
